# Supplementary material for: Prognostic impact of cancer cachexia in patients with advanced non-small cell lung cancer
Source: Springer Nature journal article supplement (doi:10.1007/s00520-014-2534-3), 2014-11-29
Supplement: MOESM4 [file 8575232]

Supplementary material

Table S4

Relationship among cachexia status, weight, skeletal muscle mass, chemotherapy-induced anorexia, and response rate

| Cachexia status | N | Weight change (mean±SE, kg) a | P-value b | LSMI change (mean±SE, kg) a | P-value b | ≥Gr2 CIA (%) | RR (%) |
| --- | --- | --- | --- | --- | --- | --- | --- |
| Non-CC  → Non-CC | 28 | +0.50±0.33 | 0.3399 | -0.86±0.58 | 0.0594 | 21.4 | 39.3 |
| Non-CC  → CC | 8 | -2.77±0.80 | 0.0078 | -4.05±0.36 | 0.0078 | 37.5 | 62.5 |
| CC  → Non-CC | 14 | +1.49±0.57 | 0.0245 | -0.58±0.39 | 0.1726 | 7.1 | 28.6 |
| CC  → CC | 18 | -2.86±0.60 | <0.0001 | -2.45±0.63 | 0.0021 | 22.2 | 22.2 |

a) Mean change was calculated with the following formula: (value at T2 - baseline value); negative values indicate loss.

b) Wilcoxon's signed-rank test

CC: cancer cachexia, SE: standard error, CIA: chemotherapy-induced anorexia, RR: response rate
